# Supplementary material for: Lithium-ion attack on yttrium oxide in the presence of copper powder during Li plating in a super-concentrated electrolyte
Source: Royal Society of Chemistry journal article supplement (doi:10.1039/d0ra10388h), 2021-01-01
Supplement: d0ra10388h1.pdf [file d0ra10388h1.pdf]

## Supplementary information

Lithium-ion attack on yttrium oxide in the presence of copper powder during Li plating in a super-concentrated electrolyte

Tohru Shiga\*, Yumi Masuoka, Hiroshi Nozaki, and Nobuko Ohba

Toyota Central Research & Development Laboratories Inc.  
Yokomichi, Nagakute-city, Aichi-ken, 480-1192 Japan

\*Corresponding author. E-mail: [e0560@mosk.tytlabs.co.jp](mailto:e0560@mosk.tytlabs.co.jp)

## 1. Materials

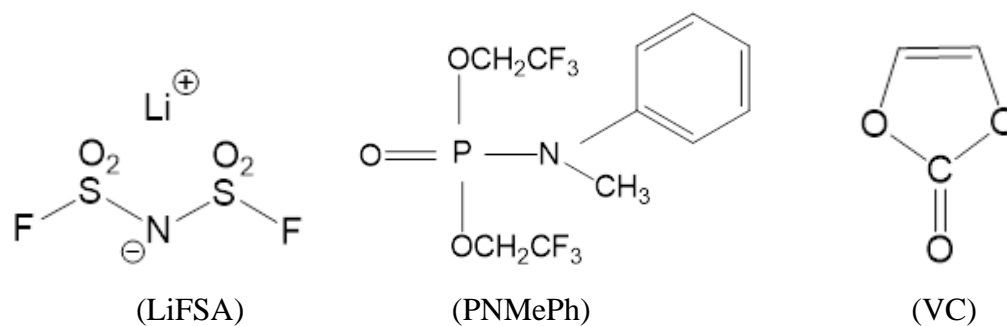

**Figure S1.** Chemical structures of LiFSA, PNMePh, and VC

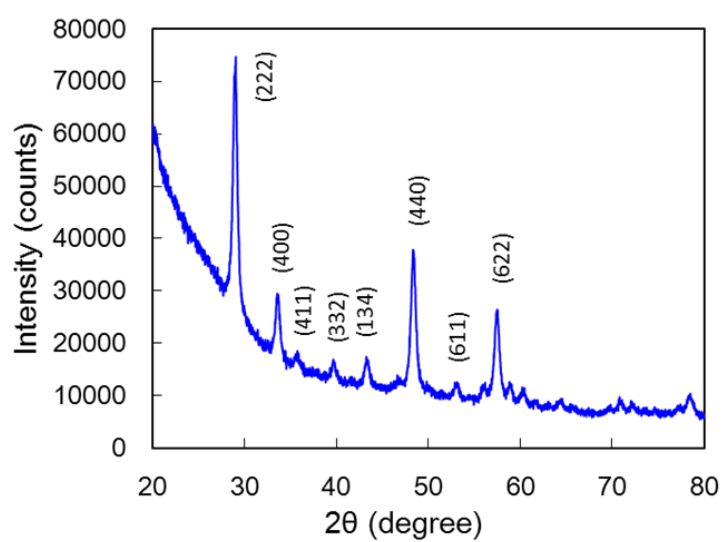

**Figure S2.** XRD pattern for  $\text{Y}_2\text{O}_3$  powder.

## 2. Experimental

### 2.1. Electrode

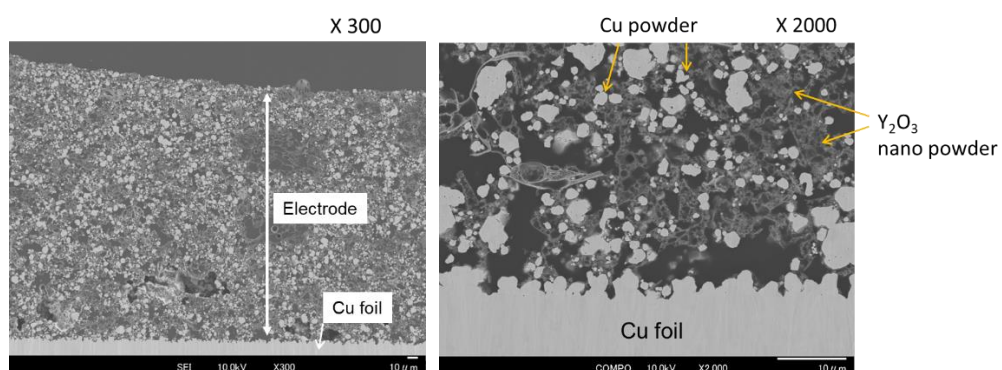

Figure S3. SEM images of the cross section of a Cu+Y<sub>2</sub>O<sub>3</sub> electrode.

### 2.2. Electrochemical cell

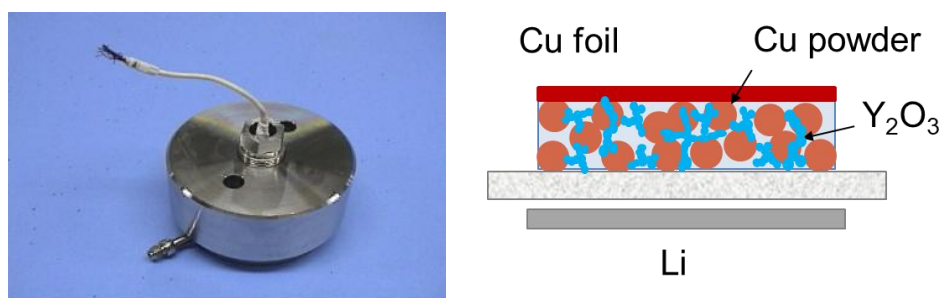

Figure S4. Photograph and schematic of an electrochemical cell.

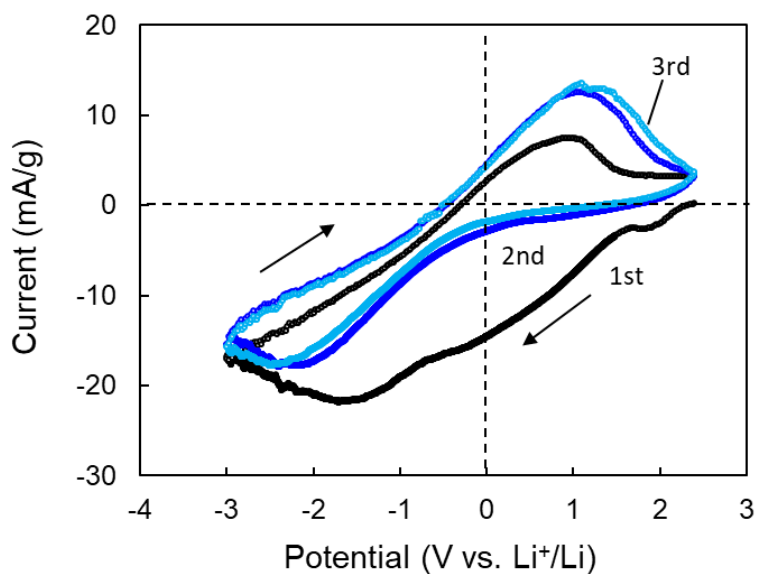

**Figure S5.** The 1<sup>st</sup> through 3<sup>rd</sup> cyclic voltammograms for LiFSA/PNMePh super-concentrated electrolyte. The sweep rate was 1 mV/sec.

**Table S1.** <sup>7</sup>Li-NMR measurement parameters

|                       |                                                         |
|-----------------------|---------------------------------------------------------|
| Measurement frequency | 155.5080156 MHz                                         |
| Spectral width        | 100 kHz                                                 |
| Pulse width           | 1.0 $\mu$ m (30° pulse)                                 |
| Pulse repetition time | 12 sec                                                  |
| Observation point     | 8192 points                                             |
| Reference material    | 1M LiCl aqueous solution                                |
| Temperature           | Room temperature                                        |
| Rotational frequency  | 0 Hz, 15 Hz                                             |
| Sample tube           | ZrO <sub>2</sub> , inner diameter 1 mm<br>Length 2.5 mm |

**Table S2.** XAFS measurement parameters

|                       |                                             |
|-----------------------|---------------------------------------------|
| Experimental facility | Aichi Synchrotron Radiation Center in Japan |
| Experimental station  | BL11S2                                      |
| Split                 | Si(111)2Crystal spectroscopy                |
| Absorption end        | Y-K absorption end (17038.0 eV)             |
| Detection method      | Through the law                             |
| Detectors             | Ion chambers                                |

### 3. Results

#### 3.1. Li plating behavior for the cell fabricated using only Cu powder

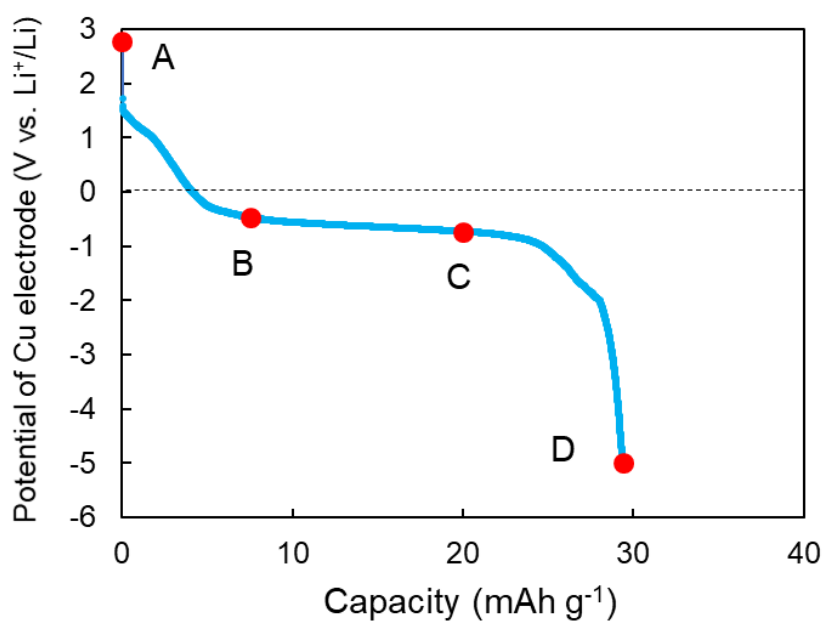

**Figure S6.** Cu electrode potential-capacity curve for the electrode fabricated using only Cu powder. The samples A,B,C, and D were applied to the EIS measurement.

### 3.2. EIS results

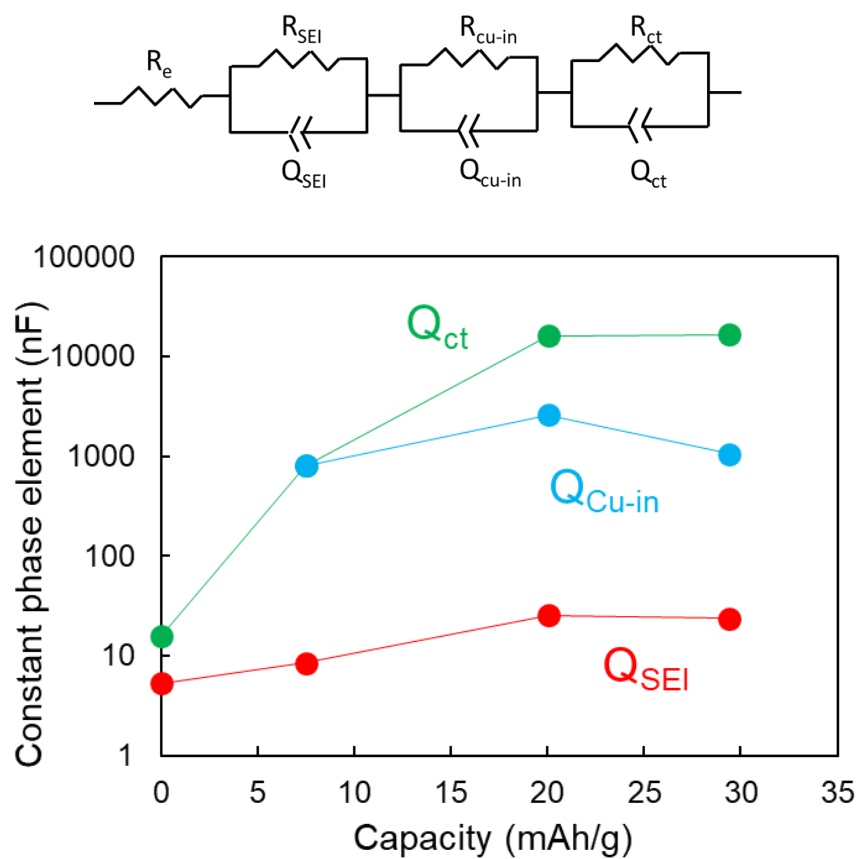

**Figure S7.** Equivalent circuit (top) and constant phase elements (bottom) for the three components of the cell using Cu powder electrode.

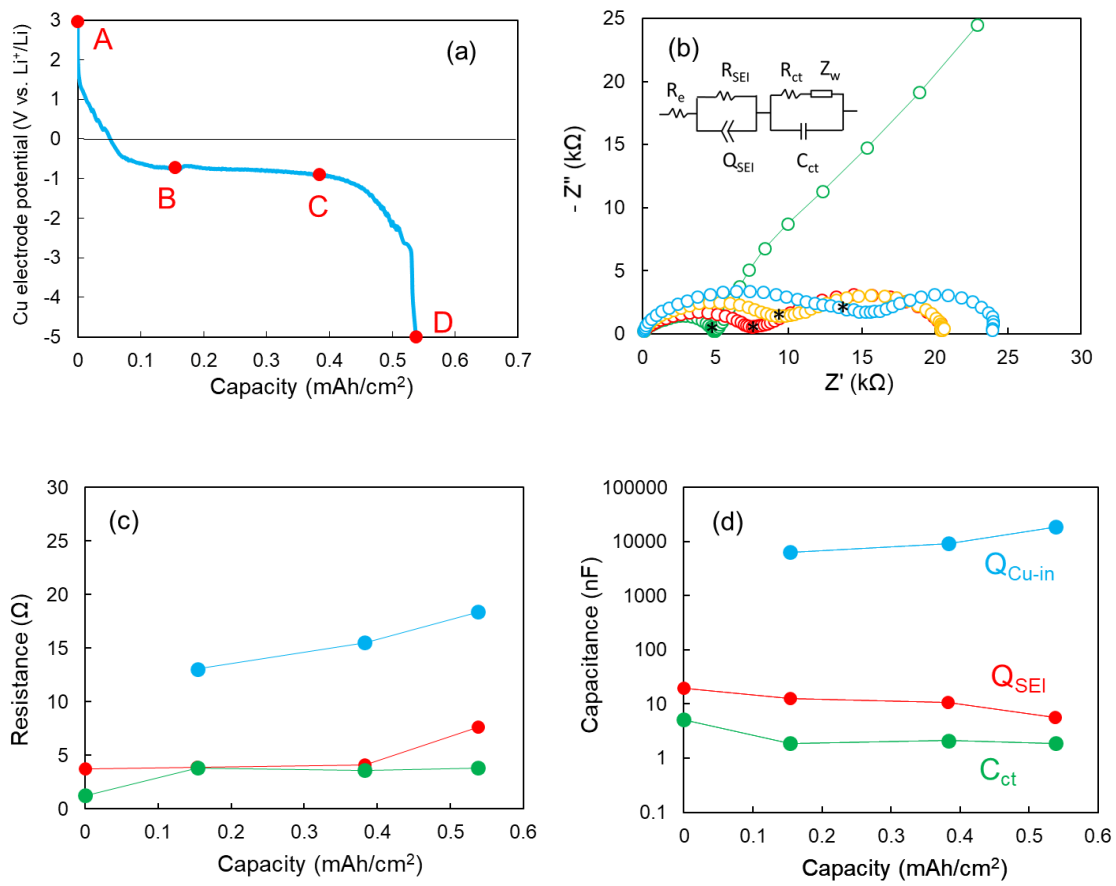

**Figure S8.** EIS results for the cell using Cu foil electrode.

### 3.3. Calculation results

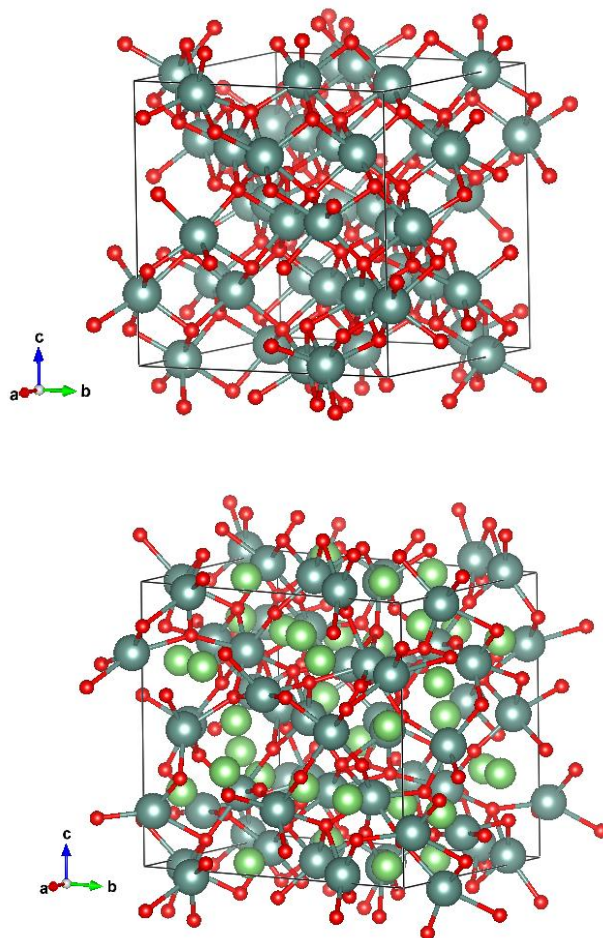

**Figure S9.** Crystal structure of bulk  $\text{Y}_2\text{O}_3$  (upper) and  $\text{Li}_{1.5}\text{Y}_2\text{O}_3$  (bottom). The dark and light green, and red circles represent yttrium, lithium, and oxygen elements in turn.

**Table S3.** Bader charge ( $e$ ) for each element in  $\text{Y}_2\text{O}_3$  and  $\text{Li}_{1.5}\text{Y}_2\text{O}_3$

|    | $\text{Y}_2\text{O}_3$ | $\text{Li}_{1.5}\text{Y}_2\text{O}_3$ |
|----|------------------------|---------------------------------------|
| Y  | 2.14                   | 1.62                                  |
| O  | -1.43                  | -1.52                                 |
| Li | —                      | 0.85                                  |



### 3.4. Charge-discharge curves for the Cu+Y<sub>2</sub>O<sub>3</sub> cells

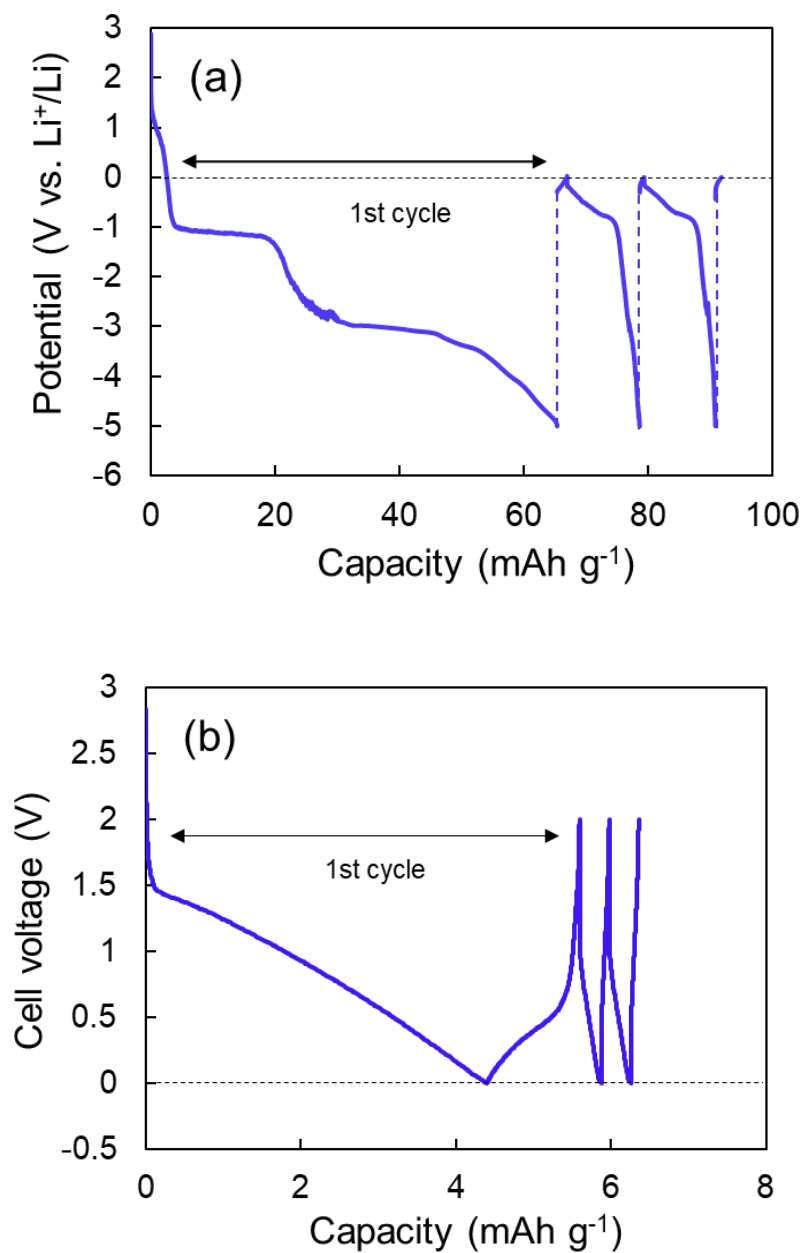

**Figure S10.** Charge/discharge curves for Cu+Y<sub>2</sub>O<sub>3</sub> cells using Li metal electrode between (a) -5 V - 0V, and (b) 0 V - +2 V.

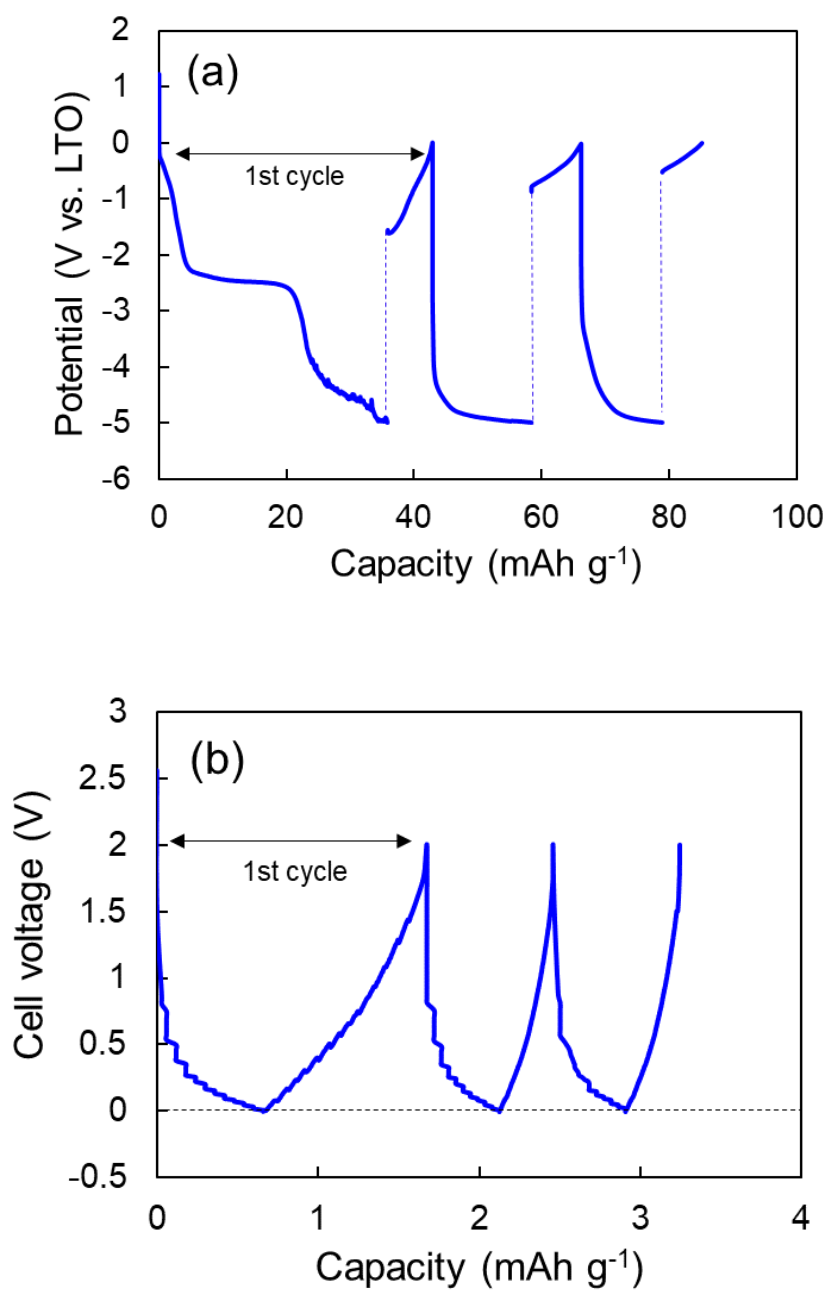

**Figure S11.** Charge/discharge curves for Cu+Y<sub>2</sub>O<sub>3</sub> cells using Li-doped LTO (Li<sub>4</sub>Ti<sub>5</sub>O<sub>12</sub>) electrode between (a) -5 V - 0V, and (b) 0 V - +2V.

### 3.5. FE-SEM images

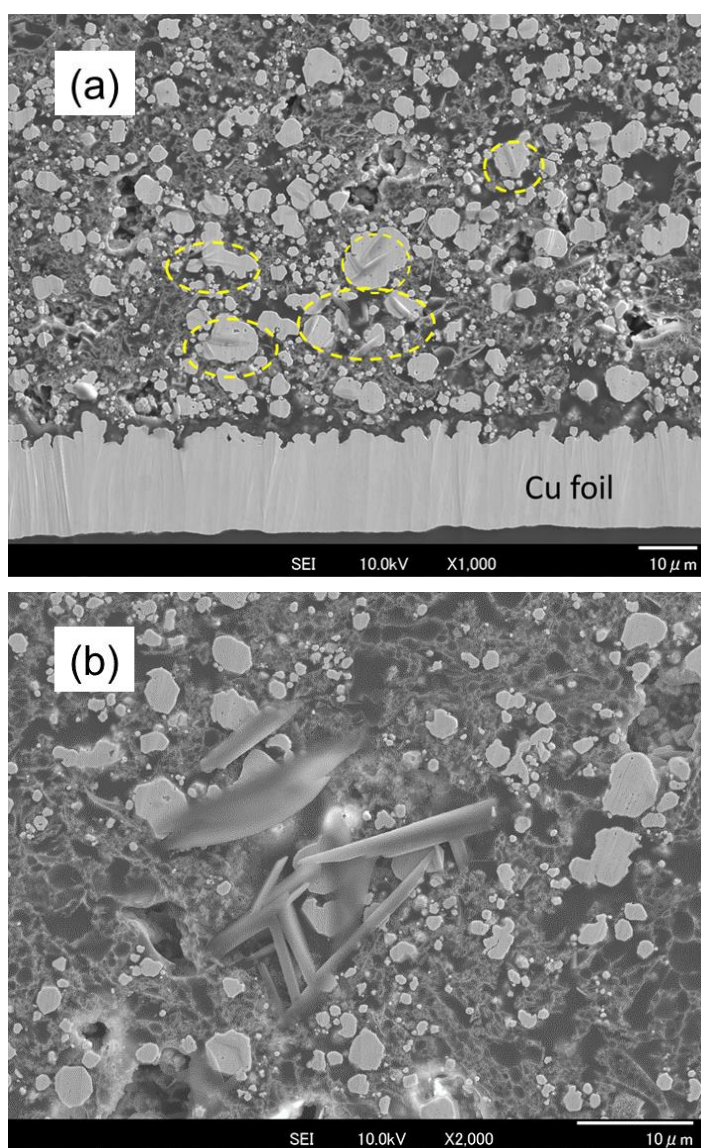

**Figure S12.** FE-SEM images of electrodeposited metallic lithium at (a) 1000x, and (b) 2000x magnification.

### 3.6. EDX results

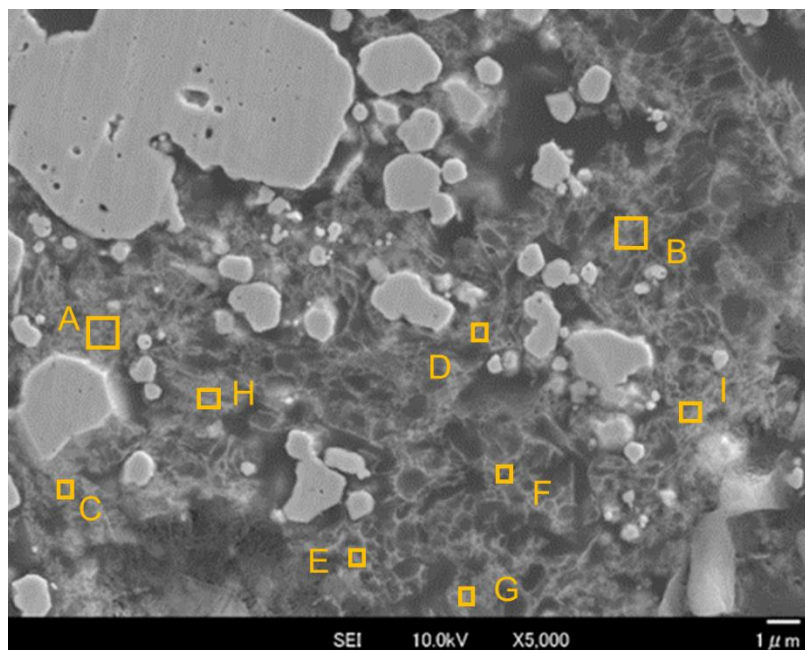

|   | C    | O    | F   | Cu   | Y    | Y/O   |
|---|------|------|-----|------|------|-------|
| A | 63.7 | 9.6  | 4.1 | 6.4  | 16.2 | 1.688 |
| B | 79.1 | 6.1  | 4.1 | 0.9  | 9.8  | 1.606 |
| C | 52.3 | 11.3 | 4   | 8    | 24.4 | 2.159 |
| D | 70.2 | 6.6  | 4.7 | 2.2  | 16.3 | 2.469 |
| E | 76.8 | 5.7  | 4.3 | 0.2  | 13   | 2.281 |
| F | 81.5 | 5.7  | 3.3 | 0.1  | 9.3  | 1.632 |
| G | 70.6 | 7    | 5.1 | 0.3  | 17   | 2.429 |
| H | 71.8 | 6.8  | 5   | 0.3  | 16   | 2.353 |
| I | 1    | 7.1  | 5.2 | 65.7 | 21   | 2.958 |

**Figure S13.** EDX measurement points on the Cu+Y<sub>2</sub>O<sub>3</sub> electrode after Li plating (top) and the EDX results (bottom).

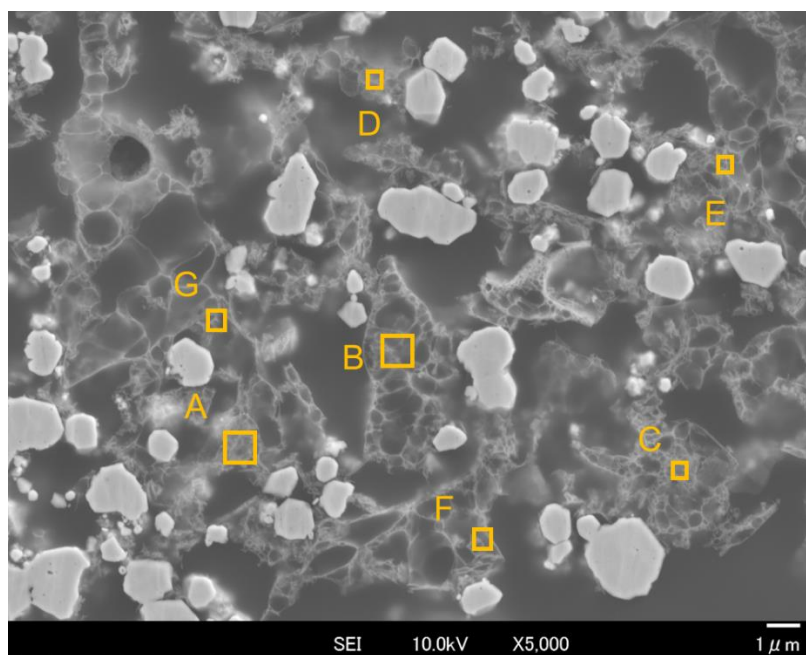

|   | C    | O   | F   | Cu   | Y    | Y/O   |
|---|------|-----|-----|------|------|-------|
| A | 73.8 | 7.1 | 2.4 | 8.1  | 8.7  | 1.225 |
| B | 83.7 | 6.4 | 1.4 | 3.5  | 5    | 0.781 |
| C | 84.9 | 5.8 | 1.8 | 0.1  | 7.5  | 1.293 |
| D | 43.9 | 5.3 | 2.6 | 40.1 | 8    | 1.509 |
| E | 37.7 | 4   | 1.9 | 51.4 | 4.9  | 1.225 |
| F | 59.5 | 9.5 | 3.4 | 9.6  | 17   | 1.789 |
| G | 72.1 | 7.6 | 1.7 | 5.8  | 12.8 | 1.684 |

**Figure S14.** EDX measurement points on the Cu+Y<sub>2</sub>O<sub>3</sub> electrode before Li plating (top) and the EDX results (bottom).

### 3.7. $^7\text{Li}$ -NMR results

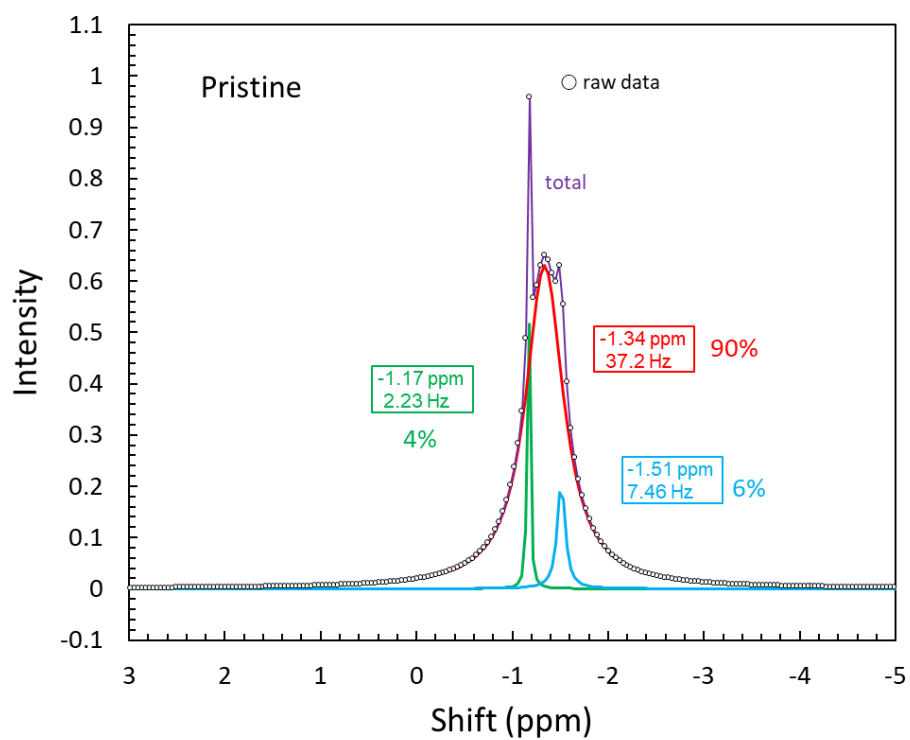

**Figure S15.** Waveform separation results for the region near 0 ppm in the  $^7\text{Li}$ -NMR spectrum of a  $\text{Cu}+\text{Y}_2\text{O}_3$  electrode before Li plating.
